# Supplementary material for: Origin, Genetic Variation and Molecular Epidemiology of SARS-CoV-2 Strains Circulating in Sardinia (Italy) during the First and Second COVID-19 Epidemic Waves
Source: MDPI journal article supplement (doi:10.3390/v15020277), 2023-01-18
Supplement: s1 [file s1]

**Supplementary Table S2: Sars-Cov-2 samples Coverage**

ONT: Oxford Nanopore Technologies

| Sample ID     | NGS Method | Mean Coverage | Sd Coverage | Median Coverage |
|---------------|------------|---------------|-------------|-----------------|
| ITA/SS-COV-01 | Illumina   | 1881.61       | 2327.93     | 476.00          |
| ITA/SS-COV-02 | Illumina   | 2191.72       | 2474.28     | 910.00          |
| ITA/SS-COV-03 | Illumina   | 1940.37       | 2359.53     | 624.00          |
| ITA/SS-COV-04 | Illumina   | 2226.57       | 2567.46     | 1170.00         |
| ITA/SS-COV-05 | Illumina   | 2201.52       | 2559.64     | 943.50          |
| ITA/SS-COV-06 | Illumina   | 2059.29       | 2455.94     | 757.00          |
| ITA/SS-COV-07 | Illumina   | 2159.27       | 2531.01     | 873.00          |
| ITA/SS-COV-08 | Illumina   | 2334.80       | 2601.78     | 1438.50         |
| ITA/SS-COV-09 | Illumina   | 4990.61       | 3097.16     | 6432.00         |
| ITA/SS-COV-11 | Illumina   | 4454.18       | 3043.49     | 4764.00         |
| ITA/SS-COV-12 | Illumina   | 4154.37       | 3039.22     | 3969.00         |
| ITA/SS-COV-13 | Illumina   | 4433.35       | 2935.36     | 4765.00         |
| ITA/SS-COV-14 | Illumina   | 5606.18       | 2959.69     | 7365.00         |
| ITA/SS-COV-15 | Illumina   | 6051.63       | 2483.15     | 7369.00         |
| ITA/SS-COV-16 | Illumina   | 5686.81       | 2711.39     | 7079.00         |
| ITA/SS-COV-17 | Illumina   | 6241.75       | 2523.14     | 7672.00         |
| ITA/SS-COV-18 | Illumina   | 6673.78       | 1959.40     | 7697.00         |
| ITA/SS-COV-19 | Illumina   | 6702.33       | 2143.07     | 7783.00         |
| ITA/SS-COV-20 | Illumina   | 5792.72       | 2804.69     | 7408.00         |
| ITA/SS-COV-21 | Illumina   | 5315.05       | 2910.66     | 6782.00         |
| ITA/SS-COV-22 | Illumina   | 6538.76       | 2184.01     | 7712.00         |
| ITA/SS-COV-23 | Illumina   | 6054.17       | 2617.45     | 7552.00         |
| ITA/SS-COV-25 | Illumina   | 6700.47       | 2106.31     | 7779.00         |
| ITA/SS-COV-26 | Illumina   | 6598.13       | 2263.57     | 7780.00         |
| ITA/SS-COV-27 | Illumina   | 6472.27       | 2271.49     | 7704.00         |
| ITA/SS-COV-28 | Illumina   | 6126.48       | 2363.49     | 7367.00         |
| ITA/SS-COV-29 | Illumina   | 6412.49       | 2300.02     | 7716.00         |
| ITA/SS-COV-30 | Illumina   | 6978.98       | 1829.92     | 7846.00         |
| ITA/SS-COV-31 | Illumina   | 6679.85       | 2105.32     | 7754.00         |
| ITA/SS-COV-32 | Illumina   | 6578.20       | 2140.37     | 7717.00         |
| ITA/SS-COV-33 | Illumina   | 7132.87       | 1655.09     | 7872.00         |
| ITA/SS-COV-34 | Illumina   | 6885.73       | 1966.40     | 7846.00         |
| ITA/SS-COV-35 | Illumina   | 6289.57       | 2334.34     | 7572.00         |
| ITA/SS-COV-36 | Illumina   | 6866.42       | 1822.35     | 7794.00         |
| ITA/SS-COV-37 | Illumina   | 6898.27       | 1789.19     | 7781.00         |
| ITA/SS-COV-38 | Illumina   | 6840.85       | 1956.97     | 7818.00         |
| ITA/SS-COV-39 | Illumina   | 5415.82       | 2850.28     | 6828.00         |
| ITA/SS-COV-40 | Illumina   | 6497.60       | 2274.42     | 7738.00         |
| ITA/SS-COV-41 | Illumina   | 6828.04       | 1926.61     | 7819.00         |
| ITA/SS-COV-42 | Illumina   | 6362.39       | 2302.20     | 7608.00         |
| ITA/SS-COV-43 | Illumina   | 6592.23       | 2121.69     | 7702.00         |
| ITA/SS-COV-44 | Illumina   | 6812.15       | 1929.26     | 7798.00         |
| ITA/SS-COV-45 | Illumina   | 5955.82       | 2624.20     | 7435.00         |
| ITA/SS-COV-46 | Illumina   | 6107.79       | 2536.00     | 7559.00         |
| ITA/SS-COV-47 | Illumina   | 374.08        | 139.05      | 378.00          |
| ITA/SS-COV-48 | ONT        | 399.89        | 135.69      | 388.00          |
| ITA/SS-COV-49 | ONT        | 284.08        | 135.35      | 284.00          |
| ITA/SS-COV-50 | ONT        | 353.82        | 140.11      | 363.00          |
| ITA/SS-COV-51 | ONT        | 379.21        | 138.50      | 383.00          |

|               |     |        |        |        |
|---------------|-----|--------|--------|--------|
| ITA/SS-COV-52 | ONT | 232.18 | 109.29 | 221.00 |
| ITA/SS-COV-53 | ONT | 221.09 | 113.25 | 214.00 |
| ITA/SS-COV-54 | ONT | 256.97 | 130.92 | 253.00 |
| ITA/SS-COV-55 | ONT | 56.73  | 26.65  | 53.00  |
| ITA/SS-COV-56 | ONT | 67.22  | 33.72  | 64.00  |
| ITA/SS-COV-57 | ONT | 45.66  | 22.06  | 45.00  |
