# Supplementary material for: Origin, Genetic Variation and Molecular Epidemiology of SARS-CoV-2 Strains Circulating in Sardinia (Italy) during the First and Second COVID-19 Epidemic Waves
Source: MDPI journal article supplement (doi:10.3390/v15020277), 2023-01-18
Supplement: s1 [file s1]

**Supplementary Table S3.** Amino acid mutations detected in the SARS-CoV-2 proteins. The number of samples presenting a specific mutation is reported in brackets. The percentages of the mutations for each protein is reported in the box below.

| ORF1ab                                             |                                                                           |                                                                                                                                                     |                                              |                      |                                                                               |         |          |          |                                                                                 |                                                                                                            |                                                |                      |                    |                                                                                                                                                                                                                                                                                                                      | ns3                                                                                                |                              | ns8                                                        |                                                                                                                                                                                   |
|----------------------------------------------------|---------------------------------------------------------------------------|-----------------------------------------------------------------------------------------------------------------------------------------------------|----------------------------------------------|----------------------|-------------------------------------------------------------------------------|---------|----------|----------|---------------------------------------------------------------------------------|------------------------------------------------------------------------------------------------------------|------------------------------------------------|----------------------|--------------------|----------------------------------------------------------------------------------------------------------------------------------------------------------------------------------------------------------------------------------------------------------------------------------------------------------------------|----------------------------------------------------------------------------------------------------|------------------------------|------------------------------------------------------------|-----------------------------------------------------------------------------------------------------------------------------------------------------------------------------------|
|                                                    |                                                                           |                                                                                                                                                     |                                              |                      |                                                                               |         |          |          |                                                                                 |                                                                                                            |                                                |                      |                    | S                                                                                                                                                                                                                                                                                                                    |                                                                                                    | ns7a                         |                                                            | N                                                                                                                                                                                 |
| nsp1                                               | nsp2                                                                      | nsp3                                                                                                                                                | nsp4                                         | nsp5                 | nsp6                                                                          | nsp7    | nsp9     | nsp10    | nsp12                                                                           | nsp13                                                                                                      | nsp14                                          | nsp15                | nsp16              |                                                                                                                                                                                                                                                                                                                      |                                                                                                    |                              |                                                            |                                                                                                                                                                                   |
| F143I(1)<br><br>K141Q(1)<br>L140del(1)<br>S142V(1) | H194Y(1)<br>I273T(2)<br>L289F(1)<br>P191L(2)<br>Q496H(27)<br><br>T170I(1) | A358T(1)<br><br>A890D(1)<br>D9G(1)<br>E159G(3)<br>I1412T(1)<br>I1683T(2)<br>I385T(1)<br>I868L(1)<br>P1442L(1)<br>S1534G(1)<br>T183I(1)<br>V1229F(1) | A380V(1)<br>L438I(1)<br>M324I(2)<br>V103A(6) | M162I(1)<br>T304I(6) | C221F(1)<br>F108del(1)<br>G107del(1)<br>L260F(1)<br><br>L37F(1)<br>S106del(1) | D77Y(1) | M101I(2) | T101I(1) | A185S(2)<br>A97V(1)<br>L186F(1)<br>P323L(55)<br>T26I(1)<br>V720I(2)<br>V776L(2) | A267S(4)<br>A389T(1)<br>A505V(1)<br>A598S(2)<br><br>E261D(2)<br>H290Y(2)<br>K218R(2)<br>S74P(1)<br>V60L(2) | A435V(6)<br>A96V(1)<br><br>P297L(1)<br>P46S(2) | L162F(1)<br>S287L(1) | S33I(1)<br>T93M(1) | A222V(44)<br>A262S(8)<br>A570D(1)<br>A67V(1)<br><br>A771S(1)<br>D118H(1)<br>D614G(55)<br>E1195A(1)<br>H69del(3)<br>L1203F(1)<br>L822F(1)<br>N439K(2)<br>N501Y(1)<br>P272L(8)<br>P631S(1)<br>P681H(1)<br>Q677H(1)<br>Q836L(1)<br>S477N(2)<br>S982A(1)<br>T716I(1)<br>T791I(1)<br>V70del(3)<br>Y144F(28)<br>Y144del(1) | A54S(1)<br>G100C(1)<br>N256D(1)<br><br>Q57H(2)<br><br>S26L(2)<br>V202L(1)<br>V255del(1)<br>V97L(1) | E95stop(1)<br><br>G38stop(1) | P70S(4)<br>Q27stop(1)<br>R52I(1)<br><br>T87I(2)<br>Y73C(1) | A182S(1)<br>A220V(45)<br>A35E(6)<br>A376T(2)<br>D3L(1)<br>G204L(1)<br>G204R(6)<br>H145Y(3)<br>M234I(2)<br>P46S(2)<br>Q389H(1)<br><br>R203E(6)<br>R203K(6)<br>S235F(1)<br>T141I(2) |
| 3.5%                                               | 5.2%                                                                      | 10.3%                                                                                                                                               | 3.5%                                         | 1.7%                 | 5.2%                                                                          | 0.9%    | 0.9%     | 0.9%     | 6%                                                                              | 7.8%                                                                                                       | 3.4%                                           | 1.7%                 | 1.7%               | 21.6%                                                                                                                                                                                                                                                                                                                | 6.9%                                                                                               | 1.7%                         | 4.3%                                                       | 12.9%                                                                                                                                                                             |
